# Supplementary material
Source: publisher site journal article supplement (https://www.dovepress.com/article/359437)
Supplement: Supplementary file 1 [file get_supplementary_file.php]

## Supplementary Material

**Supplementary Table 1. Participant socio-demographic characteristics (% , n)**

| Socio-demographic characteristic |                                          | %    | n    |
|----------------------------------|------------------------------------------|------|------|
| Sex                              | Male                                     | 48.6 | 994  |
|                                  | Female                                   | 51.3 | 1048 |
|                                  | Other                                    | 0.1  | 2    |
| Age, years                       | 18 to 24                                 | 11.3 | 231  |
|                                  | 25 to 34                                 | 18.5 | 378  |
|                                  | 35 to 44                                 | 19.4 | 397  |
|                                  | 45 to 54                                 | 16.7 | 342  |
|                                  | 55 to 64                                 | 15.2 | 311  |
|                                  | 65 to 74                                 | 12.2 | 249  |
|                                  | 75 or over                               | 6.6  | 134  |
| Region of residence              | Metro                                    | 69.2 | 1414 |
|                                  | Rural/regional                           | 30.8 | 628  |
| Language spoken at home          | English                                  | 91.7 | 1872 |
|                                  | Other                                    | 8.3  | 170  |
| Highest education                | Still studying                           | 3.1  | 63   |
|                                  | High school or less                      | 22.5 | 459  |
|                                  | Trade qualification                      | 8.1  | 165  |
|                                  | Certificate/Diploma                      | 31.0 | 633  |
|                                  | Bachelor degree/higher                   | 33.8 | 691  |
|                                  | Refused                                  | 1.6  | 33   |
| Work status                      | Full-time                                | 29.8 | 610  |
|                                  | Part-time                                | 19.5 | 398  |
|                                  | Student                                  | 5.7  | 115  |
|                                  | Homemaker                                | 9.2  | 188  |
|                                  | Unemployed                               | 7.1  | 145  |
|                                  | Retired                                  | 20.5 | 418  |
|                                  | Unable to work due to disability         | 5.0  | 103  |
|                                  | Volunteer, other, refused, don't know    | 3.2  | 66   |
| Household income                 | <\$20,000                                | 7.4  | 151  |
|                                  | \$20,001-\$40,000                        | 19.2 | 392  |
|                                  | \$40,001-\$60,000                        | 16.9 | 345  |
|                                  | \$60,001-\$80,000                        | 11.9 | 242  |
|                                  | \$80,001-\$100,000                       | 10.6 | 217  |
|                                  | \$100,001-\$150,000                      | 14.6 | 298  |
|                                  | >\$150,000                               | 7.2  | 147  |
|                                  | Don't know/not stated                    | 12.2 | 250  |
| Family's financial stress        | Spend more than earn/get                 | 11.0 | 225  |
|                                  | Get by                                   | 27.7 | 565  |
|                                  | Bit left over saved or spent             | 44.0 | 899  |
|                                  | Saves a lot                              | 12.3 | 251  |
|                                  | Don't know                               | 5.0  | 102  |
| Marital status                   | Married/Partner                          | 58.7 | 1199 |
|                                  | Divorced/separated/widowed/never married | 41.0 | 839  |
|                                  | Not stated                               | 6    | 0.3  |
| Country of Birth                 | Australia                                | 77.7 | 1574 |
|                                  | UK/Ireland                               | 6.7  | 135  |
|                                  | Europe                                   | 3.4  | 68   |
|                                  | Americas (North, South)                  | 0.5  | 11   |
|                                  | Asia                                     | 9.0  | 182  |
|                                  | New Zealand/Pacific Islands              | 2.8  | 56   |

Supplementary Figure 1. Mean (SD) sleep duration (minutes) on weekdays/before workdays (panel A) and weekends/before non-workdays (panel B) in relation to age and sex.

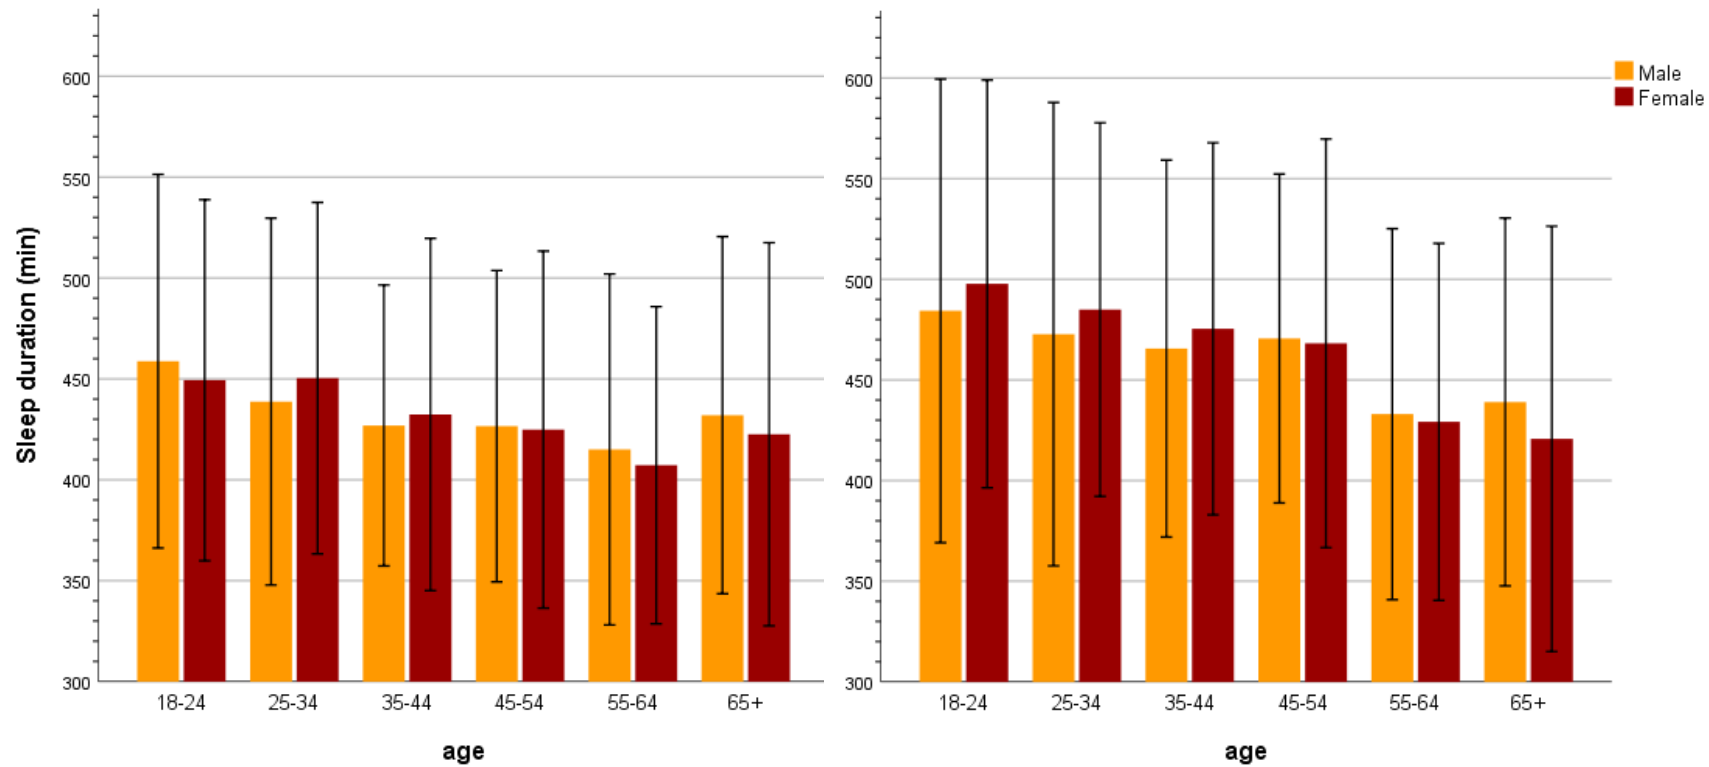

ANOVA  $p$  for differences in mean week day/work day sleep duration across age groups in males  $p=0.015$ , females  $<0.001$ .

ANOVA  $p$  for differences in mean weekend/non-work day sleep duration across age groups in males  $p<0.001$ , females  $<0.001$ .

**Supplementary Table 2. Prevalence of insomnia symptoms [% (95%CI)] by sex, age, and definition in the total sample.**

|                   | No DIMS<br>+/- daytime<br>problems | ≥1 Acute DIMS<br>+/- daytime<br>problems | No daytime<br>symptoms | ≥1 Chronic DIMS<br>≥ 1 chronic<br>daytime<br>symptom<br>+ TIB <7.5hr | ≥ 1 chronic daytime<br>symptom<br>+ TIB ≥7.5hr<br>(Insomnia) | p value |
|-------------------|------------------------------------|------------------------------------------|------------------------|----------------------------------------------------------------------|--------------------------------------------------------------|---------|
| <b>Overall, n</b> | 830                                | 183                                      | 243                    | 200                                                                  | 548                                                          |         |
| <b>% (95% CI)</b> | 41.4 (39.3-43.6)                   | 9.1 (7.9-10.5)                           | 12.1 (10.8-13.6)       | 10.0 (8.7-11.4)                                                      | 27.3 (25.4-29.3)                                             |         |
| <b>Sex</b>        |                                    |                                          |                        |                                                                      |                                                              | <0.001  |
| Males, n          | 425                                | 72                                       | 146                    | 93                                                                   | 239                                                          |         |
| % (95% CI)        | 43.6 (40.5-46.7)                   | 7.4 (5.9-9.2)                            | 15.0 (12.8-17.3)       | 9.5 (7.8-11.5)                                                       | 24.5 (21.9-27.3)                                             |         |
| Females, n        | 405                                | 111                                      | 97                     | 107                                                                  | 309                                                          |         |
| % (95% CI)        | 39.4 (36.4-42.4)                   | 10.8 (9.0-12.8)                          | 9.4 (7.8-11.3)         | 10.4 (8.6-12.4)                                                      | 30.0 (27.3-32.9)                                             |         |
| <b>Males</b>      |                                    |                                          |                        |                                                                      |                                                              | <0.001  |
| Age <55y          | 44.7 (40.1-49.3)                   | 12.2 (9.4-15.5)                          | 8.8 (6.4-11.7)         | 11.3 (8.6-14.5)                                                      | 23.0 (19.3-27.1)                                             |         |
| Age ≥55y          | 42.7 (38.5-46.9)                   | 3.4 (2.1-5.2)                            | 20.1 (16.9-23.7)       | 8.1 (6.0-10.6)                                                       | 25.8 (22.2-29.6)                                             |         |
| <b>Females</b>    |                                    |                                          |                        |                                                                      |                                                              | 0.007   |
| Age <55y          | 39.0 (35.9-42.3)                   | 11.8 (9.8-14.1)                          | 8.4 (6.7-10.4)         | 10.1 (8.2-12.2)                                                      | 30.6 (27.7-33.8)                                             |         |
| Age ≥55y          | 41.2 (33.5-49.3)                   | 4.7 (2.1-9.1)                            | 15.5 (10.4-22.0)       | 12.2 (7.6-18.1)                                                      | 26.4 (19.8-33.9)                                             |         |

DIMS- Difficulties initiating or maintaining sleep

TIB: Time in bed on work or weekdays

n for sample =2006 due to missing time in bed data for chronic DIMS and daytime symptoms

Chi<sup>2</sup> p-value for distribution across insomnia categories males vs females within age <55 years p=0.064, within age ≥55y p=0.39.

**Supplementary Table 3. Socio-demographic characteristics of participants (% , n) in relation to insomnia status in participants without frequent pain-related sleep disturbance.**

|                                     | NO DIMS              |      | ACUTE DIMS           |      | CHRONIC DIMS       |      | CHRONIC DIMS                             |      | Total                                               |      |
|-------------------------------------|----------------------|------|----------------------|------|--------------------|------|------------------------------------------|------|-----------------------------------------------------|------|
|                                     | +/- daytime problems |      | +/- daytime problems |      | No daytime problem |      | ≥ 1 chronic daytime problem + TIB <7.5hr |      | ≥ 1 chronic daytime problem + TIB ≥7.5hr (Insomnia) |      |
|                                     | (n=791)              |      | (n=165)              |      | (n=227)            |      | (n=147)                                  |      | (n=402)                                             |      |
|                                     | %                    | n    | %                    | n    | %                  | n    | %                                        | n    | %                                                   | n    |
| <b>Sex</b>                          |                      |      | <i>p</i> =0.008      |      | <i>p</i> =0.027    |      | <i>p</i> =0.20                           |      | <i>p</i> =0.036                                     |      |
| Male                                | 50.7                 | 401  | 39.4                 | 65   | 59.0               | 134  | 44.9                                     | 66   | 44.3                                                | 178  |
| Female                              | 49.3                 | 390  | 60.6                 | 100  | 41.0               | 93   | 55.1                                     | 81   | 55.7                                                | 224  |
| <b>Age, mean (SD)</b>               | 47.1                 | (17) | <i>p</i> <0.001      |      | <i>p</i> <0.001    |      | <i>p</i> =0.95                           |      | <i>p</i> =0.43                                      |      |
| Age, mean (SD)                      | 47.1                 | (17) | 37.9                 | (15) | 54.3               | (17) | 46.1                                     | (15) | 45.3                                                | (17) |
| <b>Residential area</b>             |                      |      | <i>p</i> =0.81       |      | <i>p</i> =0.11     |      | <i>p</i> =0.32                           |      | <i>p</i> =0.53                                      |      |
| Metro                               | 71.2                 | 563  | 72.1                 | 119  | 65.6               | 149  | 75.2                                     | 112  | 69.4                                                | 279  |
| Rural/regional                      | 28.8                 | 228  | 27.9                 | 46   | 34.4               | 78   | 24.8                                     | 37   | 30.6                                                | 123  |
| <b>Main language spoken at home</b> |                      |      | <i>p</i> =0.25       |      | <i>p</i> <0.001    |      | <i>p</i> =0.052                          |      | <i>p</i> <0.001                                     |      |
| English                             | 88.6                 | 701  | 85.5                 | 141  | 95.6               | 217  | 94.0                                     | 140  | 95.8                                                | 385  |
| Other                               | 11.4                 | 90   | 14.5                 | 24   | 4.4                | 10   | 6.0                                      | 9    | 4.2                                                 | 17   |
| <b>Family financial stress</b>      |                      |      | <i>p</i> =0.48       |      | <i>p</i> =0.29     |      | <i>p</i> =0.35                           |      | <i>p</i> =0.044                                     |      |
| Spend more than get                 | 9.8                  | 73   | 12.8                 | 19   | 6.4                | 14   | 12.6                                     | 18   | 11.3                                                | 44   |
| Bit left over saved or spent        | 75.2                 | 559  | 74.3                 | 110  | 77.6               | 170  | 76.2                                     | 109  | 79.0                                                | 308  |
| Saves a lot                         | 14.9                 | 111  | 12.8                 | 19   | 16.0               | 35   | 11.2                                     | 16   | 9.7                                                 | 38   |
| <b>Annual household income</b>      |                      |      | <i>p</i> =0.44       |      | <i>p</i> =0.72     |      | <i>p</i> =0.82                           |      | <i>p</i> =0.67                                      |      |
| <\$20,000                           | 7.5                  | 51   | 10.4                 | 14   | 5.6                | 11   | 5.9                                      | 8    | 7.0                                                 | 26   |
| \$20,001-\$40,000                   | 20.4                 | 139  | 15.7                 | 21   | 23.6               | 46   | 23.7                                     | 32   | 22.9                                                | 85   |
| \$40,001-\$80,000                   | 32.1                 | 218  | 37.3                 | 50   | 33.8               | 66   | 30.4                                     | 41   | 34.2                                                | 127  |
| \$80,001-\$100,000                  | 13.1                 | 89   | 11.9                 | 16   | 11.3               | 22   | 11.1                                     | 15   | 11.1                                                | 41   |
| ≥ \$100,000                         | 26.9                 | 183  | 24.6                 | 33   | 25.6               | 50   | 28.9                                     | 39   | 24.8                                                | 92   |
| <b>Highest education attained</b>   |                      |      | <i>p</i> =0.33       |      | <i>p</i> =0.010    |      | <i>p</i> =0.34                           |      | <i>P</i> =0.008                                     |      |
| Still studying                      | 2.8                  | 22   | 5.0                  | 8    | 3.1                | 7    | 3.4                                      | 5    | 2.0                                                 | 8    |
| High school                         | 21.6                 | 168  | 17.4                 | 28   | 25.3               | 57   | 26.5                                     | 39   | 22.3                                                | 88   |
| Diploma/certificate/Trade           | 34.7                 | 270  | 37.9                 | 61   | 43.1               | 97   | 36.7                                     | 54   | 43.8                                                | 173  |
| Bachelor degree or higher           | 40.8                 | 317  | 39.8                 | 64   | 28.4               | 64   | 33.3                                     | 49   | 31.9                                                | 126  |
| <b>Country of birth</b>             |                      |      | <i>p</i> =0.10       |      | <i>p</i> =0.002    |      | <i>p</i> =0.087                          |      | <i>p</i> =0.001                                     |      |
| Australia/Pacific                   | 77.1                 | 602  | 79.8                 | 130  | 75.3               | 171  | 83.8                                     | 124  | 85.0                                                | 341  |
| UK/Ireland/Europe/<br>Americas      | 10.8                 | 84   | 5.5                  | 9    | 18.1               | 41   | 10.1                                     | 15   | 9.2                                                 | 37   |
| Asia                                | 12.2                 | 95   | 14.7                 | 24   | 6.6                | 15   | 6.1                                      | 9    | 5.7                                                 | 23   |
| <b>Work status</b>                  |                      |      | <i>p</i> =0.012      |      | <i>p</i> <0.001    |      | <i>P</i> =0.067                          |      | <i>p</i> =0.032                                     |      |
| Full time                           | 34.8                 | 275  | 33.9                 | 56   | 21.1               | 48   | 34.9                                     | 52   | 26.4                                                | 106  |
| Part-time                           | 19.6                 | 155  | 18.8                 | 31   | 20.3               | 46   | 24.2                                     | 36   | 21.1                                                | 85   |
| Student                             | 5.4                  | 43   | 9.1                  | 15   | 4.0                | 9    | 4.0                                      | 6    | 6.7                                                 | 27   |
| Homemaker                           | 7.6                  | 60   | 11.5                 | 19   | 9.7                | 22   | 9.4                                      | 14   | 11.7                                                | 47   |
| Unemployed                          | 6.3                  | 50   | 9.7                  | 16   | 4.8                | 11   | 7.4                                      | 11   | 8.0                                                 | 32   |
| Retired                             | 20.7                 | 164  | 9.7                  | 16   | 34.4               | 78   | 11.4                                     | 17   | 19.7                                                | 79   |
| Unable to work disability           | 2.5                  | 20   | 2.4                  | 4    | 3.5                | 8    | 6.0                                      | 9    | 4.0                                                 | 16   |
| Volunteer, other, refused           | 3.0                  | 24   | 4.8                  | 8    | 2.2                | 5    | 2.7                                      | 4    | 2.5                                                 | 10   |

DIMS- difficulties initiating or maintaining sleep

TIB- Time in bed during the week ≥ 7.5 hrs

*p*-values identify significant differences in distribution of demographic variables compared to No DIMS group.

Missing data (refused, don't know) for sociodemographic variables for financial stress n=103, household income n=250, highest education n=33, country of birth n=16.
